# Supplementary material for: Layered transition metal oxyhydroxides as tri-functional electrocatalysts
Source: Royal Society of Chemistry journal article supplement (doi:10.1039/c5ta02063h), 2015-01-01
Supplement: c5ta02063h1.pdf [file c5ta02063h1.pdf]

### Supporting Information

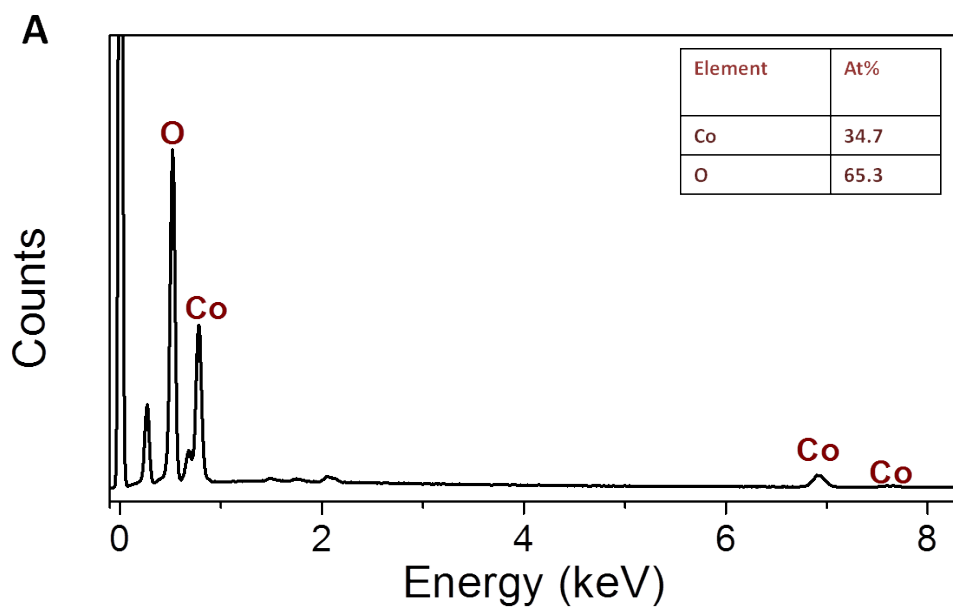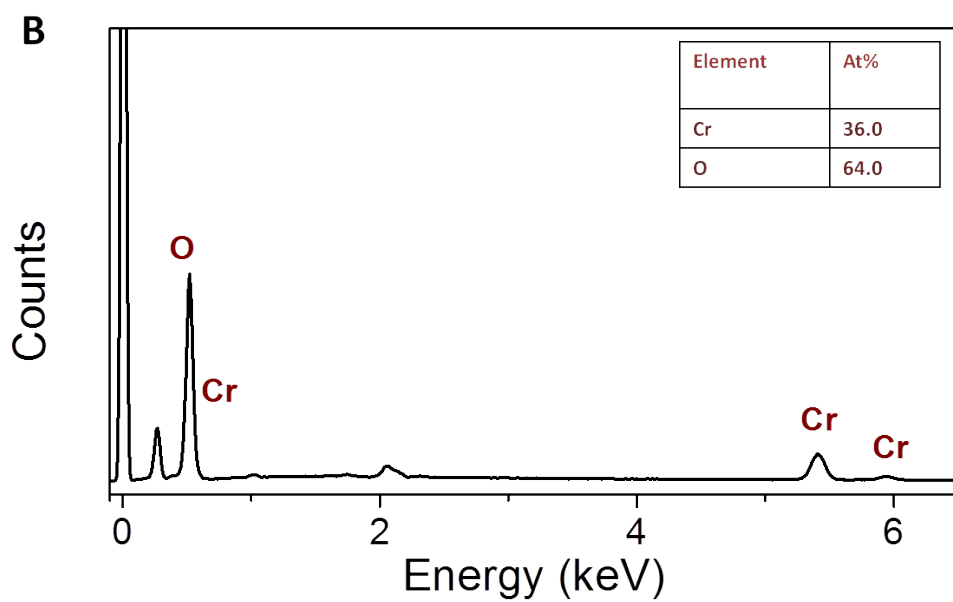

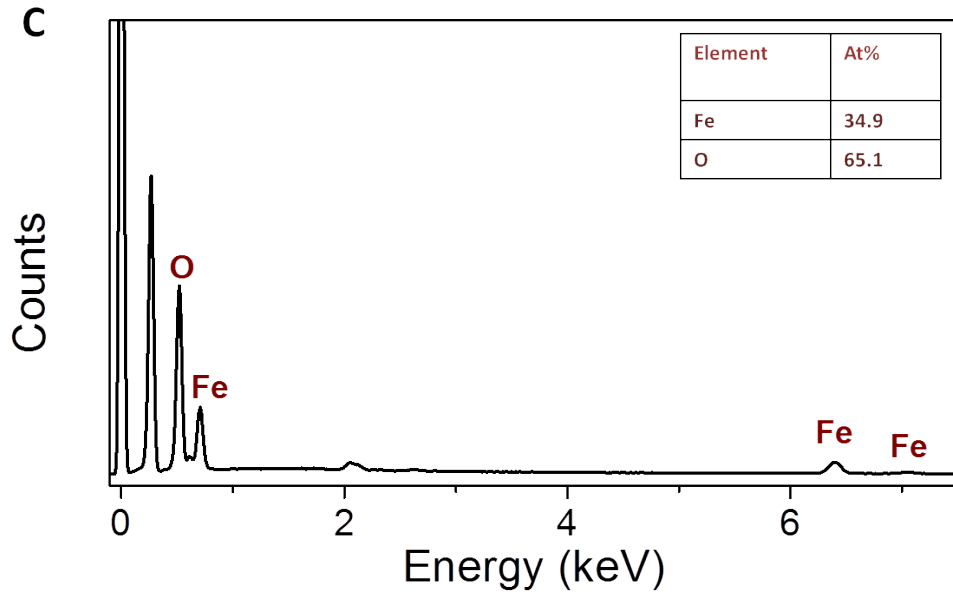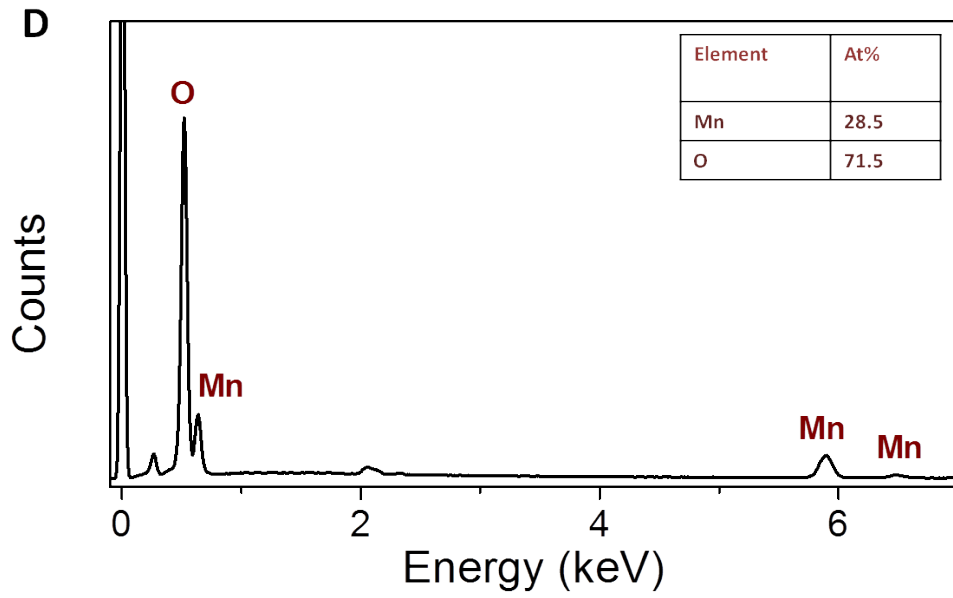

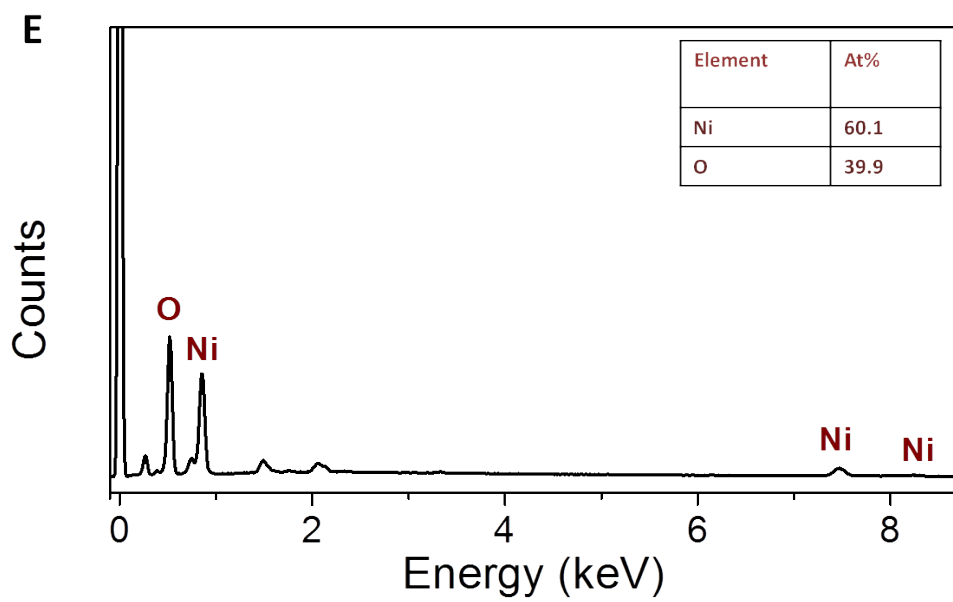

**Figure S1.** EDX spectra of (A) CoO(OH), (B) CrO(OH), (C) FeO(OH), (D) MnO(OH) and (E) NiO(OH) respectively.
